# Supplementary material
Source: ML conference proceedings conference paper supplement (https://proceedings.neurips.cc/paper_files/paper/2019/hash/c9e1074f5b3f9fc8ea15d152add07294-Abstract.html)
Supplement: Supplementary file [file c9e1074f5b3f9fc8ea15d152add07294-Supplemental.zip]

---

# Asymptotic Guarantees for Learning Generative Models with the Sliced-Wasserstein Distance

## SUPPLEMENTARY DOCUMENT

---

Kimia Nadjahi<sup>1</sup>, Alain Durmus<sup>2</sup>, Umut Şimşekli<sup>1,3</sup>, Roland Badeau<sup>1</sup>

1: LTCL, Télécom Paris, Institut Polytechnique de Paris, France

2: CMLA, ENS Cachan, CNRS, Université Paris-Saclay, France

3: Department of Statistics, University of Oxford, UK

{kimia.nadjahi, umut.simsekli, roland.badeau}@telecom-paris.fr  
alain.durmus@cmla.ens-cachan.fr

## 1 Preliminaries

### 1.1 Convergence and lower semi-continuity

**Definition 1** (Weak convergence). *Let  $(\mu_k)_{k \in \mathbb{N}}$  be a sequence of probability measures on  $\mathcal{Y}$ . We say that  $\mu_k$  converges weakly to a probability measure  $\mu$  on  $\mathcal{Y}$ , and write  $(\mu_k)_{k \in \mathbb{N}} \xrightarrow{w} \mu$  (or  $\mu_k \xrightarrow{w} \mu$ ), if for any continuous and bounded function  $f : \mathcal{Y} \rightarrow \mathbb{R}$ , we have*

$$\lim_{k \rightarrow +\infty} \int f \, d\mu_k = \int f \, d\mu .$$

**Definition 2** (Epi-convergence). *Let  $\Theta$  be a metric space and  $f : \Theta \rightarrow \mathbb{R}$ . Consider a sequence  $(f_k)_{k \in \mathbb{N}}$  of functions from  $\Theta$  to  $\mathbb{R}$ . We say that the sequence  $(f_k)_{k \in \mathbb{N}}$  epi-converges to a function  $f : \Theta \rightarrow \mathbb{R}$ , and write  $(f_k)_{k \in \mathbb{N}} \xrightarrow{e} f$ , if for each  $\theta \in \Theta$ ,*

$$\begin{aligned} & \liminf_{k \rightarrow \infty} f_k(\theta_k) \geq f(\theta) \text{ for every sequence } (\theta_k)_{k \in \mathbb{N}} \text{ such that } \lim_{k \rightarrow +\infty} \theta_k = \theta , \\ \text{and } & \limsup_{k \rightarrow \infty} f_k(\theta_k) \leq f(\theta) \text{ for a sequence } (\theta_k)_{k \in \mathbb{N}} \text{ such that } \lim_{k \rightarrow +\infty} \theta_k = \theta . \end{aligned}$$

An equivalent and useful characterization of epi-convergence is given in [1, Proposition 7.29], which we paraphrase in Proposition S4 after recalling the definition of lower semi-continuous functions.

**Definition 3** (Lower semi-continuity). *Let  $\Theta$  be a metric space and  $f : \Theta \rightarrow \mathbb{R}$ . We say that  $f$  is lower semi-continuous (l.s.c.) on  $\Theta$  if for any  $\theta_0 \in \Theta$ ,*

$$\liminf_{\theta \rightarrow \theta_0} f(\theta) \geq f(\theta_0)$$

**Proposition S4** (Characterization of epi-convergence via minimization, Proposition 7.29 of [1]). *Let  $\Theta$  be a metric space and  $f : \Theta \rightarrow \mathbb{R}$  be a l.s.c. function. The sequence  $(f_k)_{k \in \mathbb{N}}$ , with  $f_k : \Theta \rightarrow \mathbb{R}$  for any  $n \in \mathbb{N}$ , epi-converges to  $f$  if and only if*

- (a)  $\liminf_{k \rightarrow \infty} \inf_{\theta \in K} f_k(\theta) \geq \inf_{\theta \in K} f(\theta)$  for every compact set  $K \subset \Theta$  ;
- (b)  $\limsup_{k \rightarrow \infty} \inf_{\theta \in O} f_k(\theta) \leq \inf_{\theta \in O} f(\theta)$  for every open set  $O \subset \Theta$ .

[1, Theorem 7.31], paraphrased below, gives asymptotic properties for the infimum and argmin of epiconvergent functions and will be useful to prove the existence and consistency of our estimators.

**Theorem S5** (Inf and argmin in epiconvergence, Theorem 7.31 of [1]). *Let  $\Theta$  be a metric space,  $f : \Theta \rightarrow \mathbb{R}$  be a l.s.c. function and  $(f_k)_{k \in \mathbb{N}}$  be a sequence with  $f_k : \Theta \rightarrow \mathbb{R}$  for any  $n \in \mathbb{N}$ . Suppose  $(f_k)_{k \in \mathbb{N}} \xrightarrow{e} f$  with  $-\infty < \inf_{\theta \in \Theta} f(\theta) < \infty$ .*

(a) It holds  $\lim_{k \rightarrow \infty} \inf_{\theta \in \Theta} f_k(\theta) = \inf_{\theta \in \Theta} f(\theta)$  if and only if for every  $\eta > 0$  there exists a compact set  $K \subset \Theta$  and  $N \in \mathbb{N}$  such for any  $k \geq N$ ,

$$\inf_{\theta \in K} f_k(\theta) \leq \inf_{\theta \in \Theta} f_k(\theta) + \eta .$$

(b) In addition,  $\limsup_{k \rightarrow \infty} \operatorname{argmin}_{\theta \in \Theta} f_k(\theta) \subset \operatorname{argmin}_{\theta \in \Theta} f(\theta)$ .

## 2 Preliminary results

In this section, we gather technical results regarding lower semi-continuity of (expected) Sliced-Wasserstein distances and measurability of MSWE which will be needed in our proofs.

### 2.1 Lower semi-continuity of Sliced-Wasserstein distances

**Lemma S6** (Lower semi-continuity of  $\mathbf{SW}_p$ ). *Let  $p \in [1, \infty)$ . The Sliced-Wasserstein distance of order  $p$  is lower semi-continuous on  $\mathcal{P}_p(\mathcal{Y}) \times \mathcal{P}_p(\mathcal{Y})$  endowed with the topology of weak convergence, i.e. for any sequences  $(\mu_k)_{k \in \mathbb{N}}$  and  $(\nu_k)_{k \in \mathbb{N}}$  of  $\mathcal{P}_p(\mathcal{Y})$  which converge weakly to  $\mu \in \mathcal{P}_p(\mathcal{Y})$  and  $\nu \in \mathcal{P}_p(\mathcal{Y})$  respectively, we have:*

$$\mathbf{SW}_p(\mu, \nu) \leq \liminf_{k \rightarrow +\infty} \mathbf{SW}_p(\mu_k, \nu_k) .$$

*Proof.* First, by the continuous mapping theorem, if a sequence  $(\mu_k)_{k \in \mathbb{N}}$  of elements of  $\mathcal{P}_p(\mathcal{Y})$  converges weakly to  $\mu$ , then for any continuous function  $f : \mathcal{Y} \rightarrow \mathbb{R}$ ,  $(f_{\#}\mu_k)_{k \in \mathbb{N}}$  converges weakly to  $f_{\#}\mu$ . In particular, for any  $u \in \mathbb{S}^{d-1}$ ,  $u_{\#}^* \mu_k \xrightarrow{w} u_{\#}^* \mu$  since  $u^*$  is a bounded linear form thus continuous.

Let  $p \in [1, \infty)$ . We introduce the two sequences  $(\mu_k)_{k \in \mathbb{N}}$  and  $(\nu_k)_{k \in \mathbb{N}}$  of elements of  $\mathcal{P}_p(\mathcal{Y})$  such that  $\mu_k \xrightarrow{w} \mu$  and  $\nu_k \xrightarrow{w} \nu$ . We show that for any  $u \in \mathbb{S}^{d-1}$ ,

$$\mathbf{W}_p^p(u_{\#}^* \mu, u_{\#}^* \nu) \leq \liminf_{k \rightarrow +\infty} \mathbf{W}_p^p(u_{\#}^* \mu_k, u_{\#}^* \nu_k) . \quad (\text{S1})$$

Indeed, if (S1) holds, then the proof is completed using the definition of the Sliced-Wasserstein distance (7) and Fatou's Lemma. Let  $u \in \mathbb{S}^{d-1}$ . For any  $k \in \mathbb{N}$ , let  $\gamma_k \in \mathcal{P}(\mathbb{R} \times \mathbb{R})$  be an optimal transference plan between  $u_{\#}^* \mu_k$  and  $u_{\#}^* \nu_k$  for the Wasserstein distance of order  $p$  which exists by [2, Theorem 4.1] i.e.

$$\mathbf{W}_p^p(u_{\#}^* \mu_k, u_{\#}^* \nu_k) = \int_{\mathbb{R} \times \mathbb{R}} |a - b| d\gamma_k(a, b) .$$

Note that by [2, Lemma 4.4] and Prokhorov's Theorem,  $(\gamma_k)_{k \in \mathbb{N}}$  is sequentially compact in  $\mathcal{P}(\mathbb{R} \times \mathbb{R})$  for the topology associated with the weak convergence. Now, consider a subsequence  $(\gamma_{\phi_1(k)})_{k \in \mathbb{N}}$  where  $\phi_1 : \mathbb{N} \rightarrow \mathbb{N}$  is increasing such that

$$\begin{aligned} \lim_{k \rightarrow +\infty} \int_{\mathbb{R} \times \mathbb{R}} |a - b|^p d\gamma_{\phi_1(k)}(a, b) &= \lim_{k \rightarrow +\infty} \mathbf{W}_p^p(u_{\#}^* \mu_{\phi_1(k)}, u_{\#}^* \nu_{\phi_1(k)}) \\ &= \liminf_{k \rightarrow +\infty} \mathbf{W}_p^p(u_{\#}^* \mu_k, u_{\#}^* \nu_k) . \end{aligned} \quad (\text{S2})$$

Since  $(\gamma_k)_{k \in \mathbb{N}}$  is sequentially compact,  $(\gamma_{\phi_1(k)})_{k \in \mathbb{N}}$  is sequentially compact as well, and therefore there exists an increasing function  $\phi_2 : \mathbb{N} \rightarrow \mathbb{N}$  and a probability distribution  $\gamma \in \mathcal{P}(\mathbb{R} \times \mathbb{R})$  such that  $(\gamma_{\phi_2(\phi_1(k))})_{k \in \mathbb{N}}$  converges weakly to  $\gamma$ . Then, we obtain by (S2),

$$\int_{\mathbb{R} \times \mathbb{R}} \|a - b\|^p d\gamma(a, b) = \lim_{k \rightarrow +\infty} \int_{\mathbb{R} \times \mathbb{R}} \|a - b\|^p d\gamma_{\phi_2(\phi_1(k))}(a, b) = \liminf_{k \rightarrow +\infty} \mathbf{W}_p^p(u_{\#}^* \mu_k, u_{\#}^* \nu_k) .$$

If we show that  $\gamma \in \Gamma(u_{\#}^* \mu, u_{\#}^* \nu)$ , it will conclude the proof of (S1) by definition of the Wasserstein distance (5). But for any continuous and bounded function  $f : \mathbb{R} \rightarrow \mathbb{R}$ , since for any  $k \in \mathbb{N}$ ,  $\gamma_k \in \Gamma(\mu_k, \nu_k)$ , and  $(\mu_k)_{k \in \mathbb{N}}, (\nu_k)_{k \in \mathbb{N}}$  converge weakly to  $\mu$  and  $\nu$  respectively, we have:

$$\begin{aligned} \int_{\mathbb{R} \times \mathbb{R}} f(a) d\gamma(a, b) &= \lim_{k \rightarrow +\infty} \int_{\mathbb{R} \times \mathbb{R}} f(a) d\gamma_{\phi_2(\phi_1(k))}(a, b) = \lim_{k \rightarrow +\infty} \int_{\mathbb{R}} f(a) du_{\#}^* \mu_{\phi_2(\phi_1(k))}(a) \\ &= \int_{\mathbb{R}} f(a) du_{\#}^* \mu(a) , \end{aligned}$$

and similarly

$$\int_{\mathbb{R} \times \mathbb{R}} f(b) d\gamma(a, b) = \int_{\mathbb{R}} f(b) du_{\#}^* \nu(a) .$$

This shows that  $\gamma \in \Gamma(u_{\#}^* \mu, u_{\#}^* \nu)$  and therefore, (S1) is true. We conclude by applying Fatou's Lemma.  $\square$

By a direct application of Lemma S6, we have the following result.

**Corollary 7.** *Assume A1. Then,  $(\mu, \theta) \mapsto \mathbf{SW}_p(\mu, \mu_{\theta})$  is lower semi-continuous in  $\mathcal{P}_p(\mathcal{Y}) \times \Theta$ .*

**Lemma S8** (Lower semi-continuity of  $\mathbb{E}\mathbf{SW}_p$ ). *Let  $p \in [1, \infty)$  and  $m \in \mathbb{N}^*$ . Denote for any  $\mu \in \mathcal{P}_p(\mathcal{Y})$ ,  $\hat{\mu}_m = (1/m) \sum_{i=1}^m \delta_{Z_i}$ , where  $Z_{1:m}$  are i.i.d. samples from  $\mu$ . Then, the map  $(\nu, \mu) \mapsto \mathbb{E}[\mathbf{SW}_p(\nu, \hat{\mu}_m)]$  is lower semi-continuous on  $\mathcal{P}_p(\mathcal{Y}) \times \mathcal{P}_p(\mathcal{Y})$  endowed with the topology of weak convergence.*

*Proof.* We consider two sequences  $(\mu_k)_{k \in \mathbb{N}}$  and  $(\nu_k)_{k \in \mathbb{N}}$  of probability measures in  $\mathcal{Y}$ , such that  $(\mu_k)_{k \in \mathbb{N}} \xrightarrow{w} \mu$  and  $(\nu_k)_{k \in \mathbb{N}} \xrightarrow{w} \nu$ , and we fix  $m \in \mathbb{N}^*$ .

By Skorokhod's representation theorem, there exists a probability space  $(\tilde{\Omega}, \tilde{\mathcal{F}}, \tilde{\mathbb{P}})$ , a sequence of random variables  $(\tilde{X}_k^1, \dots, \tilde{X}_k^m)_{k \in \mathbb{N}}$  and a random variable  $(\tilde{X}^1, \dots, \tilde{X}^m)$  defined on  $\tilde{\Omega}$  such that for any  $k \in \mathbb{N}$  and  $i \in \{1, \dots, m\}$ ,  $\tilde{X}_k^i$  has distribution  $\mu_k$ ,  $\tilde{X}^i$  has distribution  $\mu$  and  $(\tilde{X}_k^1, \dots, \tilde{X}_k^m)_{k \in \mathbb{N}}$  converges to  $(\tilde{X}^1, \dots, \tilde{X}^m)$ ,  $\tilde{\mathbb{P}}$ -almost surely. We then show that the sequence of (random) empirical distributions  $(\hat{\mu}_{k,m})_{k \in \mathbb{N}}$  defined by  $\hat{\mu}_{k,m} = (1/m) \sum_{i=1}^m \delta_{\tilde{X}_k^i}$ , weakly converges to  $\hat{\mu}_m = (1/m) \sum_{i=1}^m \delta_{\tilde{X}^i}$ ,  $\tilde{\mathbb{P}}$ -almost surely. Note that it is sufficient to show that for any deterministic sequence  $(x_k^1, \dots, x_k^m)_{k \in \mathbb{N}}$  which converges to  $(x^1, \dots, x^m)$ , i.e.  $\lim_{k \rightarrow +\infty} \max_{i \in \{1, \dots, m\}} \rho(x_k^i, x^i) = 0$ , then the sequence of empirical distributions  $(\hat{\nu}_{k,m})_{k \in \mathbb{N}}$  defined by  $\hat{\nu}_{k,m} = (1/m) \sum_{i=1}^m \delta_{x_k^i}$ , weakly converges to  $\hat{\nu}_m = (1/m) \sum_{i=1}^m \delta_{x^i}$ . Note that since the Lévy-Prokhorov metric  $\mathbf{d}_{\mathcal{P}}$  metrizes the weak convergence by [3, Theorem 6.8], we only need to show that  $\lim_{k \rightarrow +\infty} \mathbf{d}_{\mathcal{P}}(\hat{\nu}_{k,m}, \hat{\nu}_m) = 0$ . More precisely, since for any probability measure  $\zeta_1$  and  $\zeta_2$ ,

$$\mathbf{d}_{\mathcal{P}}(\zeta_1, \zeta_2) = \inf \{ \epsilon > 0 : \text{for any } A \in \mathcal{Y}, \zeta_1(A) \leq \zeta_2(A^{\epsilon}) + \epsilon \text{ and } \zeta_2(A) \leq \zeta_1(A^{\epsilon}) + \epsilon \} ,$$

where  $\mathcal{Y}$  is the Borel  $\sigma$ -field of  $(\mathcal{Y}, \rho)$  and for any  $A \in \mathcal{Y}$ ,  $A^{\epsilon} = \{x \in \mathcal{Y} : \rho(x, y) < \epsilon \text{ for any } y \in A\}$ , we get

$$\mathbf{d}_{\mathcal{P}}(\hat{\nu}_{k,m}, \hat{\nu}_m) \leq 2 \max_{i \in \{1, \dots, m\}} \rho(x_k^i, x^i) ,$$

and therefore  $\lim_{k \rightarrow +\infty} \mathbf{d}_{\mathcal{P}}(\hat{\nu}_{k,m}, \hat{\nu}_m) = 0$ , so that,  $(\hat{\nu}_{k,m})_{k \in \mathbb{N}}$  weakly converges to  $\hat{\nu}_m$ .

Finally, we have that  $\hat{\mu}_{k,m} = (1/m) \sum_{i=1}^m \delta_{\tilde{X}_k^i}$ , weakly converges to  $\hat{\mu}_m = (1/m) \sum_{i=1}^m \delta_{\tilde{X}^i}$ ,  $\tilde{\mathbb{P}}$ -almost surely and we obtain the final result using the lower semi-continuity of the Sliced-Wasserstein distance derived in Lemma S6 and Fatou's lemma which give

$$\tilde{\mathbb{E}}[\mathbf{SW}_p(\nu, \hat{\mu}_m)] \leq \tilde{\mathbb{E}} \left[ \liminf_{i \rightarrow \infty} \mathbf{SW}_p(\nu_i, \hat{\mu}_{m,i}) \right] \leq \liminf_{i \rightarrow \infty} \tilde{\mathbb{E}}[\mathbf{SW}_p(\nu_i, \hat{\mu}_{m,i})] ,$$

where  $\tilde{\mathbb{E}}$  is the expectation corresponding to  $\tilde{\mathbb{P}}$ .  $\square$

The following corollary is a direct consequence of Lemma S8.

**Corollary 9.** *Assume A1. Then,  $(\nu, \theta) \mapsto \mathbb{E}[\mathbf{SW}_p(\nu, \hat{\mu}_{\theta,m}) | Y_{1:n}]$  is lower semi-continuous on  $\mathcal{P}(\mathcal{Y}) \times \Theta$ .*

## 2.2 Measurability of the MSWE and MESWE

The measurability of the MSWE and MESWE follows from the application of [4, Corollary 1], also used in [5] and [6], and which we recall in Theorem S10.

**Theorem S10** (Corollary 1 in [4]). *Let  $U, V$  be Polish spaces and  $f$  be a real-valued Borel measurable function defined on a Borel subset  $D$  of  $U \times V$ . We denote by  $\text{proj}(D)$  the set defined as*

$$\text{proj}(D) = \{u : \text{there exists } v \in V, (u, v) \in D\}.$$

*Suppose that for each  $u \in \text{proj}(D)$ , the section  $D_u = \{v \in V, (u, v) \in D\}$  is  $\sigma$ -compact and  $f(u, \cdot)$  is lower semi-continuous with respect to the relative topology on  $D_u$ . Then,*

1. *The sets  $\text{proj}(D)$  and  $I = \{u \in \text{proj}(D), \text{for some } v \in D_u, f(u, v) = \inf_{D_u} f_u\}$  are Borel*
2. *For each  $\epsilon > 0$ , there is a Borel measurable function  $\phi_\epsilon$  satisfying, for  $u \in \text{proj}(D)$ ,*

$$\begin{aligned} f(u, \phi_\epsilon(u)) &= \inf_{D_u} f_u, & \text{if } u \in I, \\ &\leq \epsilon + \inf_{D_u} f_u, & \text{if } u \notin I, \text{ and } \inf_{D_u} f_u \neq -\infty \\ &\leq -\epsilon^{-1}, & \text{if } u \notin I, \text{ and } \inf_{D_u} f_u = -\infty. \end{aligned}$$

**Theorem S11** (Measurability of the MSWE). *Assume A1. For any  $n \geq 1$  and  $\epsilon > 0$ , there exists a Borel measurable function  $\hat{\theta}_{n,\epsilon} : \Omega \rightarrow \Theta$  that satisfies: for any  $\omega \in \Omega$ ,*

$$\hat{\theta}_{n,\epsilon}(\omega) \in \begin{cases} \text{argmin}_{\theta \in \Theta} \mathbf{SW}_p(\hat{\mu}_n(\omega), \mu_\theta), & \text{if this set is non-empty,} \\ \{\theta \in \Theta : \mathbf{SW}_p(\hat{\mu}_n(\omega), \mu_\theta) \leq \epsilon_* + \epsilon\}, & \text{otherwise.} \end{cases}$$

where  $\epsilon_* = \inf_{\theta \in \Theta} \mathbf{SW}_p(\mu_*, \mu_\theta)$ .

*Proof.* The proof consists in showing that the conditions of Theorem S10 are satisfied.

The empirical measure  $\hat{\mu}_n(\omega)$  depends on  $\omega \in \Omega$  only through  $y = (y_1, \dots, y_n) \in Y^n$ , so we can consider it as a function on  $Y^n$  rather than on  $\Omega$ . We introduce  $D = Y^n \times \Theta$ . Since  $Y$  is Polish,  $Y^n$  ( $n \in \mathbb{N}^*$ ) endowed with the product topology is Polish. For any  $y \in Y^n$ , the set  $D_y = \{\theta \in \Theta, (y, \theta) \in D\} = \Theta$  is assumed to be  $\sigma$ -compact.

The map  $y \mapsto \hat{\mu}_n(y)$  is continuous for the weak topology (see the proof of Lemma S8), as well as the map  $\theta \mapsto \mu_\theta$  according to A1. We deduce by Corollary 7 that the map  $(\mu, \theta) \mapsto \mathbf{SW}_p(\mu, \mu_\theta)$  is l.s.c. for the weak topology. Since the composition of a lower semi-continuous function with a continuous function is l.s.c., the map  $(y, \theta) \mapsto \mathbf{SW}_p(\hat{\mu}_n(y), \mu_\theta)$  is l.s.c. for the weak topology, thus measurable and for any  $y \in Y^n$ ,  $\theta \mapsto \mathbf{SW}_p(\hat{\mu}_n(y), \mu_\theta)$  is l.s.c. on  $\Theta$ . A direct application of Theorem S10 finalizes the proof. □

**Theorem S12** (Measurability of the MESWE). *Assume A1. For any  $n \geq 1$ ,  $m \geq 1$  and  $\epsilon > 0$ , there exists a Borel measurable function  $\hat{\theta}_{n,m,\epsilon} : \Omega \rightarrow \Theta$  that satisfies: for any  $\omega \in \Omega$ ,*

$$\hat{\theta}_{n,m,\epsilon}(\omega) \in \begin{cases} \text{argmin}_{\theta \in \Theta} \mathbb{E}[\mathbf{SW}_p(\hat{\mu}_n(\omega), \hat{\mu}_{\theta,m}) | Y_{1:n}], & \text{if this set is non-empty,} \\ \{\theta \in \Theta : \mathbb{E}[\mathbf{SW}_p(\hat{\mu}_n(\omega), \hat{\mu}_{\theta,m}) | Y_{1:n}] \leq \epsilon_* + \epsilon\}, & \text{otherwise.} \end{cases}$$

where  $\epsilon_* = \inf_{\theta \in \Theta} \mathbb{E}[\mathbf{SW}_p(\hat{\mu}_n(\omega), \hat{\mu}_{\theta,m}) | Y_{1:n}]$ .

*Proof.* The proof can be done similarly to the proof of Theorem S11: we verify that we can apply Theorem S10 using Corollary 9 instead of Corollary 7. □

### 3 Postponed proofs

#### 3.1 Proof of Theorem 1

**Lemma S13.** *Let  $(\mu_k)_{k \in \mathbb{N}}$  be a sequence of probability measures on  $\mathbb{R}^d$  and  $\mu$  a measure in  $\mathbb{R}^d$  such that,*

$$\lim_{k \rightarrow \infty} \mathbf{SW}_1(\mu_k, \mu) = 0.$$

*Then, there exists an increasing function  $\phi : \mathbb{N} \rightarrow \mathbb{N}$  such that the subsequence  $(\mu_{\phi(k)})_{k \in \mathbb{N}}$  converges weakly to  $\mu$ .*

*Proof.* By definition, we have that

$$\lim_{k \rightarrow \infty} \int_{\mathbb{S}^{d-1}} \mathbf{W}_1(u_{\sharp}^* \mu_k, u_{\sharp}^* \mu) d\sigma(u) = 0 .$$

Therefore by [7, Theorem 2.2.5], for  $\sigma$ -almost every ( $\sigma$ -a.e.)  $u \in \mathbb{S}^{d-1}$ , there exists a subsequence  $(u_{\sharp}^* \mu_{\phi(k)})_{k \in \mathbb{N}}$  with  $\phi : \mathbb{N} \rightarrow \mathbb{N}$  increasing, such that  $\lim_{k \rightarrow \infty} \mathbf{W}_1(u_{\sharp}^* \mu_{\phi(k)}, u_{\sharp}^* \mu) = 0$ . By [2, Theorem 6.9], it implies that for  $\sigma$ -a.e.  $u \in \mathbb{S}^{d-1}$ ,  $(u_{\sharp}^* \mu_{\phi(k)})_{k \in \mathbb{N}} \xrightarrow{w} u_{\sharp}^* \mu$ . Lévy's characterization [8, Theorem 4.3] gives that, for  $\sigma$ -a.e.  $u \in \mathbb{S}^{d-1}$  and any  $s \in \mathbb{R}$ ,

$$\lim_{k \rightarrow \infty} \Phi_{u_{\sharp}^* \mu_{\phi(k)}}(s) = \Phi_{u_{\sharp}^* \mu}(s) ,$$

where, for any distribution  $\nu \in \mathcal{P}(\mathbb{R}^p)$ ,  $\Phi_{\nu}$  denotes the characteristic function of  $\nu$  and is defined for any  $v \in \mathbb{R}^p$  as

$$\Phi_{\nu}(v) = \int_{\mathbb{R}^p} e^{i\langle v, w \rangle} d\nu(w) .$$

Then, we can conclude that for Lebesgue-almost every  $z \in \mathbb{R}^d$ ,

$$\lim_{k \rightarrow \infty} \Phi_{\mu_{\phi(k)}}(z) = \Phi_{\mu}(z) . \quad (\text{S3})$$

We can now show that  $(\mu_{\phi(k)})_{k \in \mathbb{N}} \xrightarrow{w} \mu$ , i.e. by [3, Problem 1.11, Chapter 1] for any  $f : \mathbb{R}^d \rightarrow \mathbb{R}$  continuous with compact support,

$$\lim_{n \rightarrow \infty} \int_{\mathbb{R}^d} f(z) d\mu_n(z) = \int_{\mathbb{R}^d} f(z) d\mu(z) . \quad (\text{S4})$$

Let  $f : \mathbb{R}^d \rightarrow \mathbb{R}$  be a continuous function with compact support and  $\sigma > 0$ . Consider the function  $f_{\sigma}$  defined for any  $x \in \mathbb{R}^d$  as

$$f_{\sigma}(x) = (2\pi\sigma^2)^{-d/2} \int_{\mathbb{R}^d} f(x-z) \exp(-\|z\|^2/2\sigma^2) d\text{Leb}(z) = f * g_{\sigma}(x) ,$$

where  $g_{\sigma}$  is the density of the  $d$ -dimensional Gaussian with covariance matrix  $\sigma^2 \mathbf{I}_d$  and  $*$  denotes the convolution product.

We first show that (S4) holds with  $f_{\sigma}$  in place of  $f$ . Since for any  $z \in \mathbb{R}^d$ ,  $\mathbb{E}[e^{i\langle G, z \rangle}] = e^{i\langle m, z \rangle + (1/(2\sigma^2))\|z\|^2}$  if  $G$  is a  $d$ -dimensional Gaussian random variable with zero mean and covariance matrix  $(1/\sigma^2) \mathbf{I}_d$ , by Fubini's theorem we get for any  $k \in \mathbb{N}$

$$\begin{aligned} \int_{\mathbb{R}^d} f_{\sigma}(z) d\mu_{\phi(k)}(z) &= \int_{\mathbb{R}^d} \int_{\mathbb{R}^d} f(w) g_{\sigma}(z-w) dw d\mu_{\phi(k)}(z) \\ &= \int_{\mathbb{R}^d} \int_{\mathbb{R}^d} f(w) (2\pi\sigma^2)^{-d/2} \int_{\mathbb{R}^d} e^{i\langle z-w, x \rangle} g_{1/\sigma}(x) dx dw d\mu_{\phi(k)}(z) \\ &= \int_{\mathbb{R}^d} \int_{\mathbb{R}^d} (2\pi\sigma^2)^{-d/2} f(w) e^{-i\langle w, x \rangle} g_{1/\sigma}(x) \Phi_{\mu_{\phi(k)}}(x) dx dw \\ &= (2\pi\sigma^2)^{-d/2} \int_{\mathbb{R}^d} \mathcal{F}[f](x) g_{1/\sigma}(x) \Phi_{\mu_{\phi(k)}}(x) dx , \end{aligned} \quad (\text{S5})$$

where  $\mathcal{F}[f](x) = \int_{\mathbb{R}^d} f(w) e^{i\langle w, x \rangle} dw$  denotes the Fourier transform of  $f$ <sup>1</sup>. In an analogous manner, we prove that

$$\int_{\mathbb{R}^d} f_{\sigma}(z) d\mu(z) = (2\pi\sigma^2)^{-d/2} \int_{\mathbb{R}^d} \mathcal{F}[f](x) g_{1/\sigma}(x) \Phi_{\mu}(x) dx . \quad (\text{S6})$$

Now, using that  $\mathcal{F}[f]$  is bounded by  $\int_{\mathbb{R}^d} |f(w)| dw < +\infty$  since  $f$  has compact support, we obtain that, for any  $k \in \mathbb{N}$  and  $x \in \mathbb{R}^d$ ,

$$|\mathcal{F}[f](x) g_{1/\sigma}(x) \Phi_{\mu_{\phi(k)}}(x)| \leq g_{1/\sigma}(x) \int_{\mathbb{R}^d} |f(w)| dw$$

---

<sup>1</sup>which exists since  $f$  is assumed to have a compact support

By (S3), (S5), (S6) and Lebesgue's Dominated Convergence Theorem, we obtain

$$\begin{aligned} \lim_{k \rightarrow \infty} \int_{\mathbb{R}^d} (2\pi\sigma^2)^{-d/2} \mathcal{F}[f](x) g_{1/\sigma}(x) \Phi_{\mu_{\phi(k)}}(x) dx &= \int_{\mathbb{R}^d} (2\pi\sigma^2)^{-d/2} \mathcal{F}[f](x) g_{1/\sigma}(x) \Phi_{\mu}(x) dx \\ \lim_{k \rightarrow \infty} \int_{\mathbb{R}^d} f_{\sigma}(z) d\mu_{\phi(k)}(z) &= \int_{\mathbb{R}^d} f_{\sigma}(z) d\mu(z). \end{aligned} \quad (\text{S7})$$

We can now complete the proof of (S4). For any  $\sigma > 0$ , we have

$$\begin{aligned} \left| \int_{\mathbb{R}^d} f(z) d\mu_{\phi(k)}(z) - \int_{\mathbb{R}^d} f(z) d\mu(z) \right| &\leq 2 \sup_{z \in \mathbb{R}^d} |f(z) - f_{\sigma}(z)| \\ &\quad + \left| \int_{\mathbb{R}^d} f_{\sigma}(z) d\mu_{\phi(k)}(z) - \int_{\mathbb{R}^d} f_{\sigma}(z) d\mu(z) \right|. \end{aligned}$$

Therefore by (S7), for any  $\sigma > 0$ , we get

$$\limsup_{n \rightarrow +\infty} \left| \int_{\mathbb{R}^d} f(z) d\mu_{\phi(k)}(z) - \int_{\mathbb{R}^d} f(z) d\mu(z) \right| \leq 2 \sup_{z \in \mathbb{R}^d} |f(z) - f_{\sigma}(z)|.$$

Finally [9, Theorem 8.14-b] implies that  $\lim_{\sigma \rightarrow 0} \sup_{z \in \mathbb{R}^d} |f_{\sigma}(z) - f(z)| = 0$  which concludes the proof.  $\square$

*Proof of Theorem 1.* Now, assume that

$$\lim_{k \rightarrow \infty} \mathbf{SW}_p(\mu_k, \mu) = 0 \quad (\text{S8})$$

and that  $(\mu_k)_{k \in \mathbb{N}}$  does not converge weakly to  $\mu$ . Therefore,  $\lim_{k \rightarrow \infty} \mathbf{d}_{\mathcal{P}}(\mu_k, \mu) \neq 0$ , where  $\mathbf{d}_{\mathcal{P}}$  denotes the Lévy-Prokhorov metric, and there exists  $\epsilon > 0$  and a subsequence  $(\mu_{\psi(k)})_{k \in \mathbb{N}}$  with  $\psi : \mathbb{N} \rightarrow \mathbb{N}$  increasing, such that for any  $k \in \mathbb{N}$ ,

$$\mathbf{d}_{\mathcal{P}}(\mu_{\psi(k)}, \mu) > \epsilon \quad (\text{S9})$$

In addition, by Hölder's inequality, we know that  $\mathbf{W}_1(\mu_k, \mu) \leq \mathbf{W}_p(\mu_k, \mu)$ , thus  $\mathbf{SW}_1(\mu_k, \mu) \leq \mathbf{SW}_p(\mu_k, \mu)$ , and by (S8),  $\lim_{k \rightarrow \infty} \mathbf{SW}_1(\mu_{\psi(k)}, \mu) = 0$ . Then, according to Lemma S13, there exists a subsequence  $(\mu_{\phi(\psi(k))})_{k \in \mathbb{N}}$  with  $\phi : \mathbb{N} \rightarrow \mathbb{N}$  increasing, such that

$$\mu_{\phi(\psi(k))} \xrightarrow{w} \mu$$

which is equivalent to  $\lim_{k \rightarrow \infty} \mathbf{d}_{\mathcal{P}}(\mu_{\phi(\psi(k))}, \mu) = 0$ , thus contradicts (S9). We conclude that (S8) implies  $(\mu_k)_{k \in \mathbb{N}} \xrightarrow{w} \mu$ .  $\square$

### 3.2 Minimum Sliced-Wasserstein estimators: Proof of Theorem 2

*Proof of Theorem 2.* This result is proved analogously to the proof of Theorem 2.1 in [6]. The key step is to show that the function  $\theta \mapsto \mathbf{SW}_p(\hat{\mu}_n, \mu_{\theta})$  epi-converges to  $\theta \mapsto \mathbf{SW}_p(\mu_{\star}, \mu_{\theta})$   $\mathbb{P}$ -almost surely, and then apply Theorem 7.31 of [1] (recalled in Theorem S5).

First, by A1 and Corollary 7, the map  $\theta \mapsto \mathbf{SW}_p(\mu, \mu_{\theta})$  is l.s.c. on  $\Theta$  for any  $\mu \in \mathcal{P}_p(\mathcal{Y})$ . Therefore by A3, there exists  $\theta_{\star} \in \Theta$  such that  $\mathbf{SW}_p(\mu_{\star}, \mu_{\theta_{\star}}) = \epsilon_{\star}$  and the set  $\Theta_{\epsilon}^{\star}$  is non-empty as it contains  $\theta_{\star}$ , closed by lower semi-continuity of  $\theta \mapsto \mathbf{SW}_p(\mu_{\star}, \mu_{\theta})$ , and bounded.  $\Theta_{\epsilon}^{\star}$  is thus compact, and we conclude again by lower semi-continuity that the set  $\arg\min_{\theta \in \Theta} \mathbf{SW}_p(\mu_{\star}, \mu_{\theta})$  is non-empty [10, Theorem 2.43].

Consider the event given by A2,  $E \in \mathcal{F}$  such that  $\mathbb{P}(E) = 1$  and for any  $\omega \in E$ ,  $\lim_{n \rightarrow \infty} \mathbf{SW}_p(\hat{\mu}_n(\omega), \mu_{\star}) = 0$ . Then, we prove that  $\theta \mapsto \mathbf{SW}_p(\hat{\mu}_n, \mu_{\theta})$  epi-converges to  $\theta \mapsto \mathbf{SW}_p(\mu_{\star}, \mu_{\theta})$   $\mathbb{P}$ -almost surely using the characterization in [1, Proposition 7.29], i.e. we verify that, for any  $\omega \in E$ , the two conditions below hold: for every compact set  $K \subset \Theta$  and every open set  $O \subset \Theta$ ,

$$\begin{aligned} \liminf_{n \rightarrow \infty} \inf_{\theta \in K} \mathbf{SW}_p(\hat{\mu}_n(\omega), \mu_{\theta}) &\geq \inf_{\theta \in K} \mathbf{SW}_p(\mu_{\star}, \mu_{\theta}) \\ \limsup_{n \rightarrow \infty} \inf_{\theta \in O} \mathbf{SW}_p(\hat{\mu}_n(\omega), \mu_{\theta}) &\leq \inf_{\theta \in O} \mathbf{SW}_p(\mu_{\star}, \mu_{\theta}). \end{aligned} \quad (\text{S10})$$

We fix  $\omega$  in  $E$ . Let  $K \subset \Theta$  be a compact set. By lower semi-continuity of  $\theta \mapsto \mathbf{SW}_p(\hat{\mu}_n(\omega), \mu_\theta)$ , there exists  $\theta_n = \theta_n(\omega) \in K$  such that for any  $n \in \mathbb{N}$ ,  $\inf_{\theta \in K} \mathbf{SW}_p(\hat{\mu}_n(\omega), \mu_\theta) = \mathbf{SW}_p(\hat{\mu}_n(\omega), \mu_{\theta_n})$ .

We consider the subsequence  $(\hat{\mu}_{\phi(n)})_{n \in \mathbb{N}}$  where  $\phi : \mathbb{N} \rightarrow \mathbb{N}$  is increasing such that  $\mathbf{SW}_p(\hat{\mu}_{\phi(n)}(\omega), \mu_{\theta_{\phi(n)}})$  converges to  $\liminf_{n \rightarrow \infty} \mathbf{SW}_p(\hat{\mu}_n(\omega), \mu_{\theta_n}) = \liminf_{n \rightarrow \infty} \inf_{\theta \in K} \mathbf{SW}_p(\hat{\mu}_n(\omega), \mu_\theta)$ . Since  $K$  is compact, there also exists an increasing function  $\psi : \mathbb{N} \rightarrow \mathbb{N}$  such that, for  $\theta \in K$ ,  $\lim_{n \rightarrow \infty} \rho_\Theta(\theta_{\psi(\phi(n))}, \bar{\theta}) = 0$ . Therefore, we have

$$\begin{aligned} \liminf_{n \rightarrow \infty} \inf_{\theta \in K} \mathbf{SW}_p(\hat{\mu}_n(\omega), \mu_\theta) &= \lim_{n \rightarrow \infty} \mathbf{SW}_p(\hat{\mu}_{\phi(n)}(\omega), \mu_{\theta_{\phi(n)}}) \\ &= \lim_{n \rightarrow \infty} \mathbf{SW}_p(\hat{\mu}_{\psi(\phi(n))}(\omega), \mu_{\theta_{\psi(\phi(n))}}) \\ &= \liminf_{n \rightarrow \infty} \mathbf{SW}_p(\hat{\mu}_{\psi(\phi(n))}(\omega), \mu_{\theta_{\psi(\phi(n))}}) \\ &\geq \mathbf{SW}_p(\mu_\star, \mu_{\bar{\theta}}) \\ &\geq \inf_{\theta \in K} \mathbf{SW}_p(\mu_\star, \mu_\theta), \end{aligned} \tag{S11}$$

where (S11) is obtained by lower semi-continuity since  $\hat{\mu}_{\psi(\phi(n))}(\omega) \xrightarrow{w} \mu_\star$  by A2 and Theorem 1, and  $\mu_{\theta_{\psi(\phi(n))}} \xrightarrow{w} \mu_{\bar{\theta}}$  by A1. We conclude that the first condition in (S10) holds.

Now, we fix  $O \subset \Theta$  open. By definition of the infimum, there exists a sequence  $(\theta_n)_{n \in \mathbb{N}}$  in  $O$  such that  $\{\mathbf{SW}_p(\mu_\star, \mu_{\theta_n})\}_{n \in \mathbb{N}}$  converges to  $\inf_{\theta \in O} \mathbf{SW}_p(\mu_\star, \mu_\theta)$ . For any  $n \in \mathbb{N}$ ,  $\inf_{\theta \in O} \mathbf{SW}_p(\hat{\mu}_n(\omega), \mu_\theta) \leq \mathbf{SW}_p(\hat{\mu}_n(\omega), \mu_{\theta_n})$ . Therefore,

$$\begin{aligned} \limsup_{n \rightarrow \infty} \inf_{\theta \in O} \mathbf{SW}_p(\hat{\mu}_n(\omega), \mu_\theta) &\leq \limsup_{n \rightarrow \infty} \mathbf{SW}_p(\hat{\mu}_n(\omega), \mu_{\theta_n}) \\ &\leq \limsup_{n \rightarrow \infty} (\mathbf{SW}_p(\hat{\mu}_n(\omega), \mu_\star) + \mathbf{SW}_p(\mu_\star, \mu_{\theta_n})) \text{ by the triangle inequality} \\ &\leq \limsup_{n \rightarrow \infty} \mathbf{SW}_p(\mu_\star, \mu_{\theta_n}) \text{ by A2} \\ &= \inf_{\theta \in O} \mathbf{SW}_p(\mu_\star, \mu_\theta) \text{ by definition of } (\theta_n)_{n \in \mathbb{N}}. \end{aligned}$$

This shows that the second condition in (S10) holds, and hence, the sequence of functions  $\theta \mapsto \mathbf{SW}_p(\hat{\mu}_n(\omega), \mu_\theta)$  epi-converges to  $\theta \mapsto \mathbf{SW}_p(\mu_\star, \mu_\theta)$ .

Now, we apply Theorem 7.31 of [1]. First, by [1, Theorem 7.31(b)], (9) immediately follows from the epi-convergence of  $\theta \mapsto \mathbf{SW}_p(\hat{\mu}_n(\omega), \mu_\theta)$  to  $\theta \mapsto \mathbf{SW}_p(\mu_\star, \mu_\theta)$ .

Next, we show that [1, Theorem 7.31(a)] can be applied showing that for any  $\eta > 0$  there exists a compact set  $B \subset \Theta$  and  $N \in \mathbb{N}$  such that, for all  $n \geq N$ ,

$$\inf_{\theta \in B} \mathbf{SW}_p(\hat{\mu}_n(\omega), \mu_\theta) \leq \inf_{\theta \in \Theta} \mathbf{SW}_p(\hat{\mu}_n(\omega), \mu_\theta) + \eta. \tag{S12}$$

In fact, we simply show that there exists a compact set  $B \subset \Theta$  and  $N \in \mathbb{N}$  such that, for all  $n \geq N$ ,  $\inf_{\theta \in B} \mathbf{SW}_p(\hat{\mu}_n(\omega), \mu_\theta) = \inf_{\theta \in \Theta} \mathbf{SW}_p(\hat{\mu}_n(\omega), \mu_\theta)$ .

On one hand, the second condition in (S10) gives us

$$\limsup_{n \rightarrow \infty} \inf_{\theta \in \Theta} \mathbf{SW}_p(\hat{\mu}_n(\omega), \mu_\theta) \leq \inf_{\theta \in \Theta} \mathbf{SW}_p(\mu_\star, \mu_\theta) = \epsilon_\star.$$

We deduce that there exists  $n_{\epsilon/4}(\omega)$  such that, for  $n \geq n_{\epsilon/4}(\omega)$ ,  $\inf_{\theta \in \Theta} \mathbf{SW}_p(\hat{\mu}_n(\omega), \mu_\theta) \leq \epsilon_\star + \epsilon/4$ , where  $\epsilon$  is given by A3. As  $n \geq n_{\epsilon/4}(\omega)$ , the set  $\hat{\Theta}_{\epsilon/2} = \{\theta \in \Theta : \mathbf{SW}_p(\hat{\mu}_n(\omega), \mu_\theta) \leq \epsilon_\star + \frac{\epsilon}{2}\}$  is non-empty as it contains  $\theta^*$  defined as  $\mathbf{SW}_p(\hat{\mu}_n(\omega), \mu_{\theta^*}) = \inf_{\theta \in \Theta} \mathbf{SW}_p(\hat{\mu}_n(\omega), \mu_\theta)$ .

On the other hand, by A2, there exists  $n_{\epsilon/2}(\omega)$  such that, for  $n \geq n_{\epsilon/2}(\omega)$ ,

$$\mathbf{SW}_p(\hat{\mu}_n(\omega), \mu_\star) \leq \frac{\epsilon}{2}. \tag{S13}$$

Let  $n \geq n_\star(\omega) = \max\{n_{\epsilon/4}(\omega), n_{\epsilon/2}(\omega)\}$  and  $\theta \in \hat{\Theta}_{\epsilon/2}$ . By the triangle inequality,

$$\begin{aligned} \mathbf{SW}_p(\mu_\star, \mu_\theta) &\leq \mathbf{SW}_p(\hat{\mu}_n(\omega), \mu_\star) + \mathbf{SW}_p(\hat{\mu}_n(\omega), \mu_\theta) \\ &\leq \epsilon_\star + \epsilon \quad \text{since } \theta \in \hat{\Theta}_{\epsilon/2} \text{ and by (S13)} \end{aligned}$$

This means that, when  $n \geq n_*(\omega)$ ,  $\hat{\Theta}_{\epsilon/2} \subset \Theta_\epsilon^*$ , and since  $\inf_{\theta \in \Theta} \mathbf{SW}_p(\hat{\mu}_n(\omega), \mu_\theta)$  is attained in  $\hat{\Theta}_{\epsilon/2}$ , we have

$$\inf_{\theta \in \Theta_\epsilon^*} \mathbf{SW}_p(\hat{\mu}_n(\omega), \mu_\theta) = \inf_{\theta \in \Theta} \mathbf{SW}_p(\hat{\mu}_n(\omega), \mu_\theta). \quad (\text{S14})$$

As shown in the first part of the proof  $\Theta_\epsilon^*$  is compact and then by [1, Theorem 7.31(a)], (8) is a direct consequence of (S12)-(S14) and the epi-convergence of  $\theta \mapsto \mathbf{SW}_p(\hat{\mu}_n(\omega), \mu_\theta)$  to  $\theta \mapsto \mathbf{SW}_p(\mu_*, \mu_\theta)$ .

Finally, by the same reasoning that was done earlier in this proof for  $\text{argmin}_{\theta \in \Theta} \mathbf{SW}_p(\mu_*, \mu_\theta)$ , the set  $\text{argmin}_{\theta \in \Theta} \mathbf{SW}_p(\hat{\mu}_n(\omega), \mu_\theta)$  is non-empty for  $n \geq n_*(\omega)$ .  $\square$

### 3.3 Existence and consistency of the MESWE: Proof of Theorem 3

*Proof of Theorem 3.* This result is proved analogously to the proof of [6, Theorem 2.4]. The key step is to show that the function  $\theta \mapsto \mathbb{E}[\mathbf{SW}_p(\hat{\mu}_n, \hat{\mu}_{\theta, m(n)}) | Y_{1:n}]$  epi-converges to  $\theta \mapsto \mathbb{E}[\mathbf{SW}_p(\mu_*, \mu_\theta) | Y_{1:n}]$ , and then apply [1, Theorem 7.31], which we recall in Theorem S5.

First, since we assume **A1** and **A3**, we can apply the same reasoning as in the proof of Theorem 2 to show that the set  $\text{argmin}_{\theta \in \Theta} \mathbf{SW}_p(\mu_*, \mu_\theta)$  is non-empty.

Consider the event given by **A2**,  $E \in \mathcal{F}$  such that  $\mathbb{P}(E) = 1$  and for any  $\omega \in E$ ,  $\lim_{n \rightarrow \infty} \mathbf{SW}_p(\hat{\mu}_n(\omega), \mu_*) = 0$ . Then, we prove that  $\theta \mapsto \mathbb{E}[\mathbf{SW}_p(\hat{\mu}_n, \hat{\mu}_{\theta, m(n)}) | Y_{1:n}]$  epi-converges to  $\theta \mapsto \mathbf{SW}_p(\mu_*, \mu_\theta)$   $\mathbb{P}$ -almost surely using the characterization of [1, Proposition 7.29], i.e. we verify that, for any  $\omega \in E$ , the two conditions below hold: for every compact set  $K \subset \Theta$  and for every open set  $O \subset \Theta$ ,

$$\begin{aligned} \liminf_{n \rightarrow +\infty} \inf_{\theta \in K} \mathbb{E}[\mathbf{SW}_p(\hat{\mu}_n(\omega), \hat{\mu}_{\theta, m(n)}) | Y_{1:n}] &\geq \inf_{\theta \in K} \mathbf{SW}_p(\mu_*, \mu_\theta) \\ \limsup_{n \rightarrow +\infty} \inf_{\theta \in O} \mathbb{E}[\mathbf{SW}_p(\hat{\mu}_n(\omega), \hat{\mu}_{\theta, m(n)}) | Y_{1:n}] &\leq \inf_{\theta \in O} \mathbf{SW}_p(\mu_*, \mu_\theta) \end{aligned} \quad (\text{S15})$$

We fix  $\omega$  in  $E$ . Let  $K \subset \Theta$  be a compact set. By **A1** and Corollary 9, the mapping  $\theta \mapsto \mathbb{E}[\mathbf{SW}_p(\hat{\mu}_n(\omega), \hat{\mu}_{\theta, m(n)}) | Y_{1:n}]$  is l.s.c., so there exists  $\theta_n = \theta_n(\omega) \in K$  such that for any  $n \in \mathbb{N}$ ,  $\inf_{\theta \in K} \mathbb{E}[\mathbf{SW}_p(\hat{\mu}_n(\omega), \hat{\mu}_{\theta, m(n)}) | Y_{1:n}] = \mathbb{E}[\mathbf{SW}_p(\hat{\mu}_n(\omega), \hat{\mu}_{\theta_n, m(n)}) | Y_{1:n}]$ .

We consider the subsequence  $(\hat{\mu}_{\phi(n)})_{n \in \mathbb{N}}$  where  $\phi : \mathbb{N} \rightarrow \mathbb{N}$  is increasing such that  $\mathbb{E}[\mathbf{SW}_p(\hat{\mu}_{\phi(n)}(\omega), \hat{\mu}_{\theta_{\phi(n)}, m(\phi(n))}) | Y_{1:n}]$  converges to  $\liminf_{n \rightarrow \infty} \mathbb{E}[\mathbf{SW}_p(\hat{\mu}_n(\omega), \hat{\mu}_{\theta_n, m(n)}) | Y_{1:n}] = \liminf_{n \rightarrow \infty} \inf_{\theta \in K} \mathbb{E}[\mathbf{SW}_p(\hat{\mu}_n(\omega), \hat{\mu}_{\theta, m(n)}) | Y_{1:n}]$ . Since  $K$  is compact, there also exists an increasing function  $\psi : \mathbb{N} \rightarrow \mathbb{N}$  such that, for  $\bar{\theta} \in K$ ,  $\lim_{n \rightarrow \infty} \rho_\Theta(\theta_{\psi(\phi(n))}, \bar{\theta}) = 0$ . Therefore, we have:

$$\begin{aligned} &\liminf_{n \rightarrow \infty} \inf_{\theta \in K} \mathbb{E}[\mathbf{SW}_p(\hat{\mu}_n(\omega), \hat{\mu}_{\theta, m(n)}) | Y_{1:n}] \\ &= \lim_{n \rightarrow \infty} \mathbb{E}[\mathbf{SW}_p(\hat{\mu}_{\phi(n)}(\omega), \hat{\mu}_{\theta_{\phi(n)}, m(\phi(n))}) | Y_{1:n}] \\ &= \lim_{n \rightarrow \infty} \mathbb{E}[\mathbf{SW}_p(\hat{\mu}_{\psi(\phi(n))}(\omega), \hat{\mu}_{\theta_{\psi(\phi(n))}, m(\psi(\phi(n)))}) | Y_{1:n}] \\ &= \liminf_{n \rightarrow \infty} \mathbb{E}[\mathbf{SW}_p(\hat{\mu}_{\psi(\phi(n))}(\omega), \hat{\mu}_{\theta_{\psi(\phi(n))}, m(\psi(\phi(n)))}) | Y_{1:n}] \\ &\geq \liminf_{n \rightarrow \infty} \left\{ \mathbf{SW}_p(\hat{\mu}_{\psi(\phi(n))}(\omega), \mu_{\theta_{\psi(\phi(n))}}) - \mathbb{E}[\mathbf{SW}_p(\mu_{\theta_{\psi(\phi(n))}}, \hat{\mu}_{\theta_{\psi(\phi(n))}, m(\psi(\phi(n)))}) | Y_{1:n}] \right\} \end{aligned} \quad (\text{S16})$$

$$\begin{aligned} &\geq \liminf_{n \rightarrow \infty} \mathbf{SW}_p(\hat{\mu}_{\psi(\phi(n))}(\omega), \mu_{\theta_{\psi(\phi(n))}}) - \limsup_{n \rightarrow \infty} \mathbb{E}[\mathbf{SW}_p(\mu_{\theta_{\psi(\phi(n))}}, \hat{\mu}_{\theta_{\psi(\phi(n))}, m(\psi(\phi(n)))}) | Y_{1:n}] \\ &\geq \mathbf{SW}_p(\mu_*, \mu_{\bar{\theta}}) \\ &\geq \inf_{\theta \in K} \mathbf{SW}_p(\mu_*, \mu_\theta) \end{aligned} \quad (\text{S17})$$

where (S16) follows from the triangle inequality, and (S17) is obtained on one hand by lower semi-continuity since  $\hat{\mu}_{\psi(\phi(n))}(\omega) \xrightarrow{w} \mu_*$  by **A2** and Theorem 1 and  $\mu_{\theta_{\psi(\phi(n))}} \xrightarrow{w} \mu_{\bar{\theta}}$  by **A1**, and on the



other hand by **A4** which gives  $\limsup_{n \rightarrow \infty} \mathbb{E}[\mathbf{SW}_p(\mu_{\theta_{\psi(\phi(n))}}, \hat{\mu}_{\theta_{\psi(\phi(n))}, m(\psi(\phi(n)))})|Y_{1:n}] = 0$ . We conclude that the first condition in (S15) holds.

Now, we fix  $O \subset \Theta$  open. By definition of the infimum, there exists a sequence  $(\theta_n)_{n \in \mathbb{N}}$  in  $O$  such that  $\mathbf{SW}_p(\mu_\star, \mu_{\theta_n})$  converges to  $\inf_{\theta \in O} \mathbf{SW}_p(\mu_\star, \mu_\theta)$ . For any  $n \in \mathbb{N}$ ,  $\inf_{\theta \in O} \mathbb{E}[\mathbf{SW}_p(\hat{\mu}_n(\omega), \hat{\mu}_{\theta, m(n)})|Y_{1:n}] \leq \mathbb{E}[\mathbf{SW}_p(\hat{\mu}_n(\omega), \hat{\mu}_{\theta_n, m(n)})|Y_{1:n}]$ . Therefore,

$$\begin{aligned} \limsup_{n \rightarrow \infty} \inf_{\theta \in O} \mathbb{E}[\mathbf{SW}_p(\hat{\mu}_n(\omega), \hat{\mu}_{\theta, m(n)})|Y_{1:n}] &\leq \limsup_{n \rightarrow \infty} \mathbb{E}[\mathbf{SW}_p(\hat{\mu}_n(\omega), \hat{\mu}_{\theta_n, m(n)})|Y_{1:n}] \\ &\leq \limsup_{n \rightarrow \infty} \{\mathbf{SW}_p(\hat{\mu}_n(\omega), \mu_\star) + \mathbf{SW}_p(\mu_\star, \mu_{\theta_n}) + \mathbb{E}[\mathbf{SW}_p(\mu_{\theta_n}, \hat{\mu}_{\theta_n, m(n)})|Y_{1:n}]\} \\ &\quad \text{by the triangle inequality} \\ &= \limsup_{n \rightarrow \infty} \mathbf{SW}_p(\mu_\star, \mu_{\theta_n}) \quad \text{by A2 and A4} \\ &= \inf_{\theta \in O} \mathbf{SW}_p(\mu_\star, \mu_\theta) \quad \text{by definition of } (\theta_n)_{n \in \mathbb{N}}. \end{aligned}$$

This shows that the second condition in (S15) holds, and hence, the sequence of functions  $\theta \mapsto \mathbb{E}[\mathbf{SW}_p(\hat{\mu}_n(\omega), \hat{\mu}_{\theta, m(n)})|Y_{1:n}]$  epi-converges to  $\theta \mapsto \mathbf{SW}_p(\mu_\star, \mu_\theta)$ .

Now, we apply Theorem 7.31 of [1]. First, by [1, Theorem 7.31(b)], (11) immediately follows from the epi-convergence of  $\theta \mapsto \mathbb{E}[\mathbf{SW}_p(\hat{\mu}_n(\omega), \hat{\mu}_{\theta, m(n)})|Y_{1:n}]$  to  $\theta \mapsto \mathbf{SW}_p(\mu_\star, \mu_\theta)$ .

Next, we show that [1, Theorem 7.31(a)] holds by finding, for any  $\eta > 0$ , a compact set  $B \subset \Theta$  and  $N \in \mathbb{N}$  such that, for all  $n \geq N$ ,

$$\inf_{\theta \in B} \mathbb{E}[\mathbf{SW}_p(\hat{\mu}_n(\omega), \hat{\mu}_{\theta, m(n)})|Y_{1:n}] \leq \inf_{\theta \in \Theta} \mathbb{E}[\mathbf{SW}_p(\hat{\mu}_n(\omega), \hat{\mu}_{\theta, m(n)})|Y_{1:n}] + \eta.$$

In fact, we simply show that there exists a compact set  $B \subset \Theta$  and  $N \in \mathbb{N}$  such that, for all  $n \geq N$ ,  $\inf_{\theta \in B} \mathbb{E}[\mathbf{SW}_p(\hat{\mu}_n(\omega), \hat{\mu}_{\theta, m(n)})|Y_{1:n}] = \inf_{\theta \in \Theta} \mathbb{E}[\mathbf{SW}_p(\hat{\mu}_n(\omega), \hat{\mu}_{\theta, m(n)})|Y_{1:n}]$ .

On one hand, the second condition in (S15) gives us

$$\limsup_{n \rightarrow \infty} \inf_{\theta \in \Theta} \mathbb{E}[\mathbf{SW}_p(\hat{\mu}_n(\omega), \hat{\mu}_{\theta, m(n)})|Y_{1:n}] \leq \inf_{\theta \in \Theta} \mathbf{SW}_p(\mu_\star, \mu_\theta) = \epsilon_\star.$$

We deduce that there exists  $n_{\epsilon/6}(\omega)$  such that, for  $n \geq n_{\epsilon/6}(\omega)$ ,

$$\inf_{\theta \in \Theta} \mathbb{E}[\mathbf{SW}_p(\hat{\mu}_n(\omega), \hat{\mu}_{\theta, m(n)})|Y_{1:n}] \leq \epsilon_\star + \frac{\epsilon}{6},$$

with the  $\epsilon$  of **A3**. When  $n \geq n_{\epsilon/6}(\omega)$ , the set  $\hat{\Theta}_{\epsilon/3} = \{\theta \in \Theta : \mathbb{E}[\mathbf{SW}_p(\hat{\mu}_n(\omega), \hat{\mu}_{\theta, m(n)})|Y_{1:n}] \leq \epsilon_\star + \frac{\epsilon}{3}\}$  is non-empty as it contains  $\theta^*$  defined as  $\mathbb{E}[\mathbf{SW}_p(\hat{\mu}_n(\omega), \hat{\mu}_{\theta^*, m(n)})|Y_{1:n}] = \inf_{\theta \in \Theta} \mathbb{E}[\mathbf{SW}_p(\hat{\mu}_n(\omega), \hat{\mu}_{\theta, m(n)})|Y_{1:n}]$ .

On the other hand, by **A2**, there exists  $n_{\epsilon/3}(\omega)$  such that, for  $n \geq n_{\epsilon/3}(\omega)$ ,

$$\mathbf{SW}_p(\hat{\mu}_n(\omega), \mu_\star) \leq \frac{\epsilon}{3}. \quad (\text{S18})$$

Finally, by **A4**, there exists  $n'_{\epsilon/3}(\omega)$  such that, for  $n \geq n'_{\epsilon/3}(\omega)$ ,

$$\mathbb{E}[\mathbf{SW}_p(\mu_\theta, \hat{\mu}_{\theta, m(n)})|Y_{1:n}] \leq \frac{\epsilon}{3}. \quad (\text{S19})$$

Let  $n \geq n_\star(\omega) = \max\{n_{\epsilon/6}(\omega), n_{\epsilon/3}(\omega), n'_{\epsilon/3}(\omega)\}$  and  $\theta \in \hat{\Theta}_{\epsilon/3}$ . By the triangle inequality,

$$\begin{aligned} \mathbf{SW}_p(\mu_\star, \mu_\theta) &\leq \mathbf{SW}_p(\hat{\mu}_n(\omega), \mu_\star) + \mathbb{E}[\mathbf{SW}_p(\hat{\mu}_n(\omega), \hat{\mu}_{\theta, m(n)})|Y_{1:n}] + \mathbb{E}[\mathbf{SW}_p(\mu_\theta, \hat{\mu}_{\theta, m(n)})|Y_{1:n}] \\ &\leq \epsilon_\star + \epsilon \quad \text{since } \theta \in \hat{\Theta}_{\epsilon/3} \text{ and by (S18) and (S19)} \end{aligned}$$

This means that, when  $n \geq n_\star(\omega)$ ,  $\hat{\Theta}_{\epsilon/3} \subset \Theta_\epsilon^\star$  with  $\Theta_\epsilon^\star$  as defined in **A3**, and since  $\inf_{\theta \in \Theta} \mathbb{E}[\mathbf{SW}_p(\hat{\mu}_n(\omega), \hat{\mu}_{\theta, m(n)})|Y_{1:n}]$  is attained in  $\hat{\Theta}_{\epsilon/3}$ , we have

$$\inf_{\theta \in \Theta_\epsilon^\star} \mathbb{E}[\mathbf{SW}_p(\hat{\mu}_n(\omega), \hat{\mu}_{\theta, m(n)})|Y_{1:n}] = \inf_{\theta \in \Theta} \mathbb{E}[\mathbf{SW}_p(\hat{\mu}_n(\omega), \hat{\mu}_{\theta, m(n)})|Y_{1:n}]. \quad (\text{S20})$$

By [1, Theorem 7.31(a)], (10) is a direct consequence of (S20) and the epi-convergence of  $\theta \mapsto \mathbb{E}[\mathbf{SW}_p(\hat{\mu}_n(\omega), \hat{\mu}_{\theta, m(n)})|Y_{1:n}]$  to  $\theta \mapsto \mathbf{SW}_p(\mu_*, \mu_\theta)$ .

Finally, by the same reasoning that was done earlier in this proof for  $\operatorname{argmin}_{\theta \in \Theta} \mathbf{SW}_p(\mu_*, \mu_\theta)$ , the set  $\operatorname{argmin}_{\theta \in \Theta} \mathbb{E}[\mathbf{SW}_p(\hat{\mu}_n(\omega), \hat{\mu}_{\theta, m(n)})|Y_{1:n}]$  is non-empty for  $n \geq n_*(\omega)$ .

□

### 3.4 Convergence of the MESWE to the MSWE: Proof of Theorem 4

*Proof of Theorem 4.* Here again, the result follows from applying [1, Theorem 7.31], paraphrased in Theorem S5.

First, by A1 and Corollary 7, the map  $\theta \mapsto \mathbf{SW}_p(\hat{\mu}_n, \mu_\theta)$  is l.s.c. on  $\Theta$ . Therefore, there exists  $\theta_n \in \Theta$  such that  $\mathbf{SW}_p(\hat{\mu}_n, \mu_{\theta_n}) = \epsilon_n$ . The set  $\Theta_{\epsilon, n}$  with the  $\epsilon$  from A5 is non-empty as it contains  $\theta_n$ , closed by lower semi-continuity of  $\theta \mapsto \mathbf{SW}_p(\hat{\mu}_n, \mu_\theta)$ , and bounded.  $\Theta_{\epsilon, n}$  is thus compact, and we conclude again by lower semi-continuity that the set  $\operatorname{argmin}_{\theta \in \Theta} \mathbf{SW}_p(\hat{\mu}_n, \mu_\theta)$  is non-empty [10, Theorem 2.43].

Then, we prove that  $\theta \mapsto \mathbb{E}[\mathbf{SW}_p(\hat{\mu}_n, \hat{\mu}_{\theta, m})|Y_{1:n}]$  epi-converges to  $\theta \mapsto \mathbf{SW}_p(\hat{\mu}_n, \mu_\theta)$  as  $m \rightarrow \infty$  using the characterization in [1, Proposition 7.29], i.e. we verify that: for every compact set  $K \subset \Theta$  and every open set  $O \subset \Theta$ ,

$$\begin{aligned} \liminf_{m \rightarrow \infty} \inf_{\theta \in K} \mathbb{E}[\mathbf{SW}_p(\hat{\mu}_n, \hat{\mu}_{\theta, m})|Y_{1:n}] &\geq \inf_{\theta \in K} \mathbf{SW}_p(\hat{\mu}_n, \mu_\theta) \\ \limsup_{m \rightarrow \infty} \inf_{\theta \in O} \mathbb{E}[\mathbf{SW}_p(\hat{\mu}_n, \hat{\mu}_{\theta, m})|Y_{1:n}] &\leq \inf_{\theta \in O} \mathbf{SW}_p(\hat{\mu}_n, \mu_\theta). \end{aligned} \quad (\text{S21})$$

Let  $K \subset \Theta$  be a compact set. By A1 and Corollary 9, for any  $m \in \mathbb{N}$ , the map  $\theta \mapsto \mathbb{E}[\mathbf{SW}_p(\hat{\mu}_n, \hat{\mu}_{\theta, m})|Y_{1:n}]$  is l.s.c., so there exists  $\theta_m \in K$  such that  $\inf_{\theta \in K} \mathbb{E}[\mathbf{SW}_p(\hat{\mu}_n, \hat{\mu}_{\theta, m})|Y_{1:n}] = \mathbb{E}[\mathbf{SW}_p(\hat{\mu}_n, \hat{\mu}_{\theta_m, m})|Y_{1:n}]$ .

We consider the subsequence  $\{\hat{\mu}_{\theta_{\phi(m)}, \phi(m)}\}_{m \in \mathbb{N}}$  where  $\phi : \mathbb{N} \rightarrow \mathbb{N}$  is increasing such that  $\mathbb{E}[\mathbf{SW}_p(\hat{\mu}_n, \hat{\mu}_{\theta_{\phi(m)}, \phi(m)})|Y_{1:n}]$  converges to  $\liminf_{m \rightarrow \infty} \mathbb{E}[\mathbf{SW}_p(\hat{\mu}_n, \hat{\mu}_{\theta_m, m})|Y_{1:n}] = \liminf_{m \rightarrow \infty} \inf_{\theta \in K} \mathbb{E}[\mathbf{SW}_p(\hat{\mu}_n, \hat{\mu}_{\theta, m})|Y_{1:n}]$ . Since  $K$  is compact, there also exists an increasing function  $\psi : \mathbb{N} \rightarrow \mathbb{N}$  such that, for any  $\bar{\theta} \in K$ ,  $\lim_{m \rightarrow \infty} \rho_\Theta(\theta_{\psi(\phi(m))}, \bar{\theta}) = 0$ . Therefore, we have

$$\begin{aligned} &\liminf_{m \rightarrow \infty} \inf_{\theta \in K} \mathbb{E}[\mathbf{SW}_p(\hat{\mu}_n, \hat{\mu}_{\theta, m})|Y_{1:n}] \\ &= \lim_{m \rightarrow \infty} \mathbb{E}[\mathbf{SW}_p(\hat{\mu}_n, \hat{\mu}_{\theta_{\phi(m)}, \phi(m)})|Y_{1:n}] \\ &= \lim_{m \rightarrow \infty} \mathbb{E}[\mathbf{SW}_p(\hat{\mu}_n, \hat{\mu}_{\theta_{\psi(\phi(m))}, \psi(\phi(m))})|Y_{1:n}] \\ &= \liminf_{m \rightarrow \infty} \mathbb{E}[\mathbf{SW}_p(\hat{\mu}_n, \hat{\mu}_{\theta_{\psi(\phi(m))}, \psi(\phi(m))})|Y_{1:n}] \\ &\geq \liminf_{m \rightarrow \infty} [\mathbf{SW}_p(\hat{\mu}_n, \mu_{\theta_{\psi(\phi(m))}}) - \mathbb{E}[\mathbf{SW}_p(\mu_{\theta_{\psi(\phi(m))}}, \hat{\mu}_{\theta_{\psi(\phi(m))}, \psi(\phi(m))})|Y_{1:n}]] \quad (\text{S22}) \\ &\geq \liminf_{m \rightarrow \infty} \mathbf{SW}_p(\hat{\mu}_n, \mu_{\theta_{\psi(\phi(m))}}) - \limsup_{m \rightarrow \infty} \mathbb{E}[\mathbf{SW}_p(\mu_{\theta_{\psi(\phi(m))}}, \hat{\mu}_{\theta_{\psi(\phi(m))}, \psi(\phi(m))})|Y_{1:n}] \\ &\geq \mathbf{SW}_p(\hat{\mu}_n, \mu_{\bar{\theta}}) \quad (\text{S23}) \\ &\geq \inf_{\theta \in K} \mathbf{SW}_p(\hat{\mu}_n, \mu_\theta) \end{aligned}$$

where (S22) results from the triangle inequality and (S23) is obtained by A4 on one hand and by lower semi-continuity on the other hand since  $\mu_{\theta_{\psi(\phi(m))}} \xrightarrow{w} \mu_{\bar{\theta}}$  by A1. We conclude that the first condition in (S21) holds.

Now, we fix  $O \subset \Theta$  open. By definition of the infimum, there exists a sequence  $(\theta_m)_{m \in \mathbb{N}}$  in  $O$  such that  $\mathbf{SW}_p(\hat{\mu}_n, \hat{\mu}_{\theta_m, m})$  converges to  $\inf_{\theta \in O} \mathbf{SW}_p(\hat{\mu}_n, \hat{\mu}_{\theta, m})$ . For any  $m \in \mathbb{N}$ ,

$$\begin{aligned}
\inf_{\theta \in \Theta} \mathbb{E} [\mathbf{SW}_p(\hat{\mu}_n, \hat{\mu}_{\theta, m}) | Y_{1:n}] &\leq \mathbb{E} [\mathbf{SW}_p(\hat{\mu}_n, \mu_{\theta_m, m}) | Y_{1:n}]. \text{ Therefore,} \\
\limsup_{m \rightarrow \infty} \inf_{\theta \in \Theta} \mathbb{E} [\mathbf{SW}_p(\hat{\mu}_n, \hat{\mu}_{\theta, m}) | Y_{1:n}] \\
&\leq \limsup_{m \rightarrow \infty} \mathbb{E} [\mathbf{SW}_p(\hat{\mu}_n, \hat{\mu}_{\theta_m, m}) | Y_{1:n}] \\
&\leq \limsup_{m \rightarrow \infty} [\mathbf{SW}_p(\hat{\mu}_n, \mu_{\theta_m}) + \mathbb{E} [\mathbf{SW}_p(\mu_{\theta_m}, \hat{\mu}_{\theta_m, m}) | Y_{1:n}]] \text{ by the triangle inequality} \\
&\leq \limsup_{m \rightarrow \infty} \mathbf{SW}_p(\hat{\mu}_n, \mu_{\theta_m}) \text{ by A4} \\
&= \inf_{\theta \in \Theta} \mathbf{SW}_p(\hat{\mu}_n, \mu_\theta) \text{ by definition of } (\theta_m)_{m \in \mathbb{N}}
\end{aligned}$$

This shows that the second condition in (S21) holds, and hence, the sequence of functions  $\theta \mapsto \mathbb{E} [\mathbf{SW}_p(\hat{\mu}_n, \hat{\mu}_{\theta, m}) | Y_{1:n}]$  epi-converges to  $\theta \mapsto \mathbf{SW}_p(\hat{\mu}_n, \mu_\theta)$ .

Now, we apply [1, Theorem 7.31]. By [1, Theorem 7.31(b)], (13) immediately follows from the epi-convergence of  $\theta \mapsto \mathbb{E} [\mathbf{SW}_p(\hat{\mu}_n, \hat{\mu}_{\theta, m}) | Y_{1:n}]$  to  $\theta \mapsto \mathbf{SW}_p(\hat{\mu}_n, \mu_\theta)$ .

Next, we show that [1, Theorem 7.31(a)] holds by finding for any  $\eta > 0$  a compact set  $B \subset \Theta$  and  $N \in \mathbb{N}$  such that, for all  $n \geq N$ ,

$$\inf_{\theta \in B} \mathbb{E} [\mathbf{SW}_p(\hat{\mu}_n, \hat{\mu}_{\theta, m}) | Y_{1:n}] \leq \inf_{\theta \in \Theta} \mathbb{E} [\mathbf{SW}_p(\hat{\mu}_n, \hat{\mu}_{\theta, m}) | Y_{1:n}] + \eta.$$

In fact, we simply show that there exists a compact set  $B \subset \Theta$  and  $N \in \mathbb{N}$  such that, for all  $n \geq N$ ,  $\inf_{\theta \in B} \mathbb{E} [\mathbf{SW}_p(\hat{\mu}_n, \hat{\mu}_{\theta, m}) | Y_{1:n}] = \inf_{\theta \in \Theta} \mathbb{E} [\mathbf{SW}_p(\hat{\mu}_n, \hat{\mu}_{\theta, m}) | Y_{1:n}]$ . On one hand, the second condition in (S21) gives us

$$\limsup_{m \rightarrow \infty} \inf_{\theta \in \Theta} \mathbb{E} [\mathbf{SW}_p(\hat{\mu}_n, \hat{\mu}_{\theta, m}) | Y_{1:n}] \leq \inf_{\theta \in \Theta} \mathbf{SW}_p(\hat{\mu}_n, \mu_\theta) = \epsilon_n.$$

We deduce that there exists  $m_{\epsilon/4}$  such that, for  $m \geq m_{\epsilon/4}$ ,

$$\inf_{\theta \in \Theta} \mathbb{E} [\mathbf{SW}_p(\hat{\mu}_n, \hat{\mu}_{\theta, m}) | Y_{1:n}] \leq \epsilon_n + \frac{\epsilon}{4}. \quad (\text{S24})$$

with the  $\epsilon$  of A5. When  $m \geq m_{\epsilon/4}$ , the set  $\Theta_{\epsilon/2} = \{\theta \in \Theta : \mathbb{E} [\mathbf{SW}_p(\hat{\mu}_n, \hat{\mu}_{\theta, m}) | Y_{1:n}] \leq \epsilon_n + \frac{\epsilon}{2}\}$  is non-empty as it contains  $\theta^*$  defined as  $\mathbb{E} [\mathbf{SW}_p(\hat{\mu}_n, \hat{\mu}_{\theta^*, m}) | Y_{1:n}] = \inf_{\theta \in \Theta} \mathbb{E} [\mathbf{SW}_p(\hat{\mu}_n, \hat{\mu}_{\theta, m}) | Y_{1:n}]$ .

On the other hand, by A4, there exists  $m_{\epsilon/2}$  such that, for  $m \geq m_{\epsilon/2}$ ,

$$\mathbb{E} [\mathbf{SW}_p(\mu_\theta, \hat{\mu}_{\theta, m}) | Y_{1:n}] \leq \frac{\epsilon}{2}. \quad (\text{S25})$$

Let  $\theta$  belong to  $\Theta_{\epsilon/2}$  and  $m \geq m_* = \max\{m_{\epsilon/4}, m_{\epsilon/2}\}$ . By the triangle inequality,

$$\begin{aligned}
\mathbf{SW}_p(\hat{\mu}_n, \mu_\theta) &\leq \mathbb{E} [\mathbf{SW}_p(\hat{\mu}_n, \hat{\mu}_{\theta, m}) | Y_{1:n}] + \mathbb{E} [\mathbf{SW}_p(\mu_\theta, \hat{\mu}_{\theta, m}) | Y_{1:n}] \\
&\leq \epsilon_n + \epsilon \quad \text{since } \theta \in \Theta_{\epsilon/2} \text{ and by (S25)}
\end{aligned}$$

This means that, when  $m \geq m_*$ ,  $\Theta_{\epsilon/2} \subset \Theta_{\epsilon, n}$ , and since  $\inf_{\theta \in \Theta} \mathbb{E} [\mathbf{SW}_p(\hat{\mu}_n, \hat{\mu}_{\theta, m}) | Y_{1:n}]$  is attained in  $\Theta_{\epsilon/2}$ ,

$$\inf_{\theta \in \Theta_{\epsilon, n}} \mathbb{E} [\mathbf{SW}_p(\hat{\mu}_n, \hat{\mu}_{\theta, m}) | Y_{1:n}] = \inf_{\theta \in \Theta} \mathbb{E} [\mathbf{SW}_p(\hat{\mu}_n, \hat{\mu}_{\theta, m}) | Y_{1:n}]. \quad (\text{S26})$$

By [1, Theorem 7.31(a)], (12) is a direct consequence of (S26) and the epiconvergence of  $\theta \mapsto \mathbb{E} [\mathbf{SW}_p(\hat{\mu}_n(\omega), \hat{\mu}_{\theta, m}) | Y_{1:n}]$  to  $\theta \mapsto \mathbf{SW}_p(\hat{\mu}_n, \mu_\theta)$ .

Finally, by the same reasoning that was done earlier in this proof for  $\operatorname{argmin}_{\theta \in \Theta} \mathbf{SW}_p(\hat{\mu}_n, \mu_\theta)$ , the set  $\operatorname{argmin}_{\theta \in \Theta} \mathbb{E} [\mathbf{SW}_p(\hat{\mu}_n, \hat{\mu}_{\theta, m}) | Y_{1:n}]$  is non-empty for  $m \geq m_*$ .

□

### 3.5 Proof of Rate of convergence and asymptotic distribution: Proof of Theorem 5 and Theorem 6

*Proof of Theorem 5 and Theorem 6.* The proof of Theorem 5 and Theorem 6 consists in showing that the conditions of Theorem 4.2 and Theorem 7.2 in [11] respectively are satisfied: conditions (i), (ii) and (iii) follow from A6, A7 and A8. □

## 4 Computational Aspects

The MSWE and MESWE are in general computationally intractable, partly because the Sliced-Wasserstein distance requires an integration over infinitely many projections. In this section, we review the numerical methods used to approximate these two estimators.

**Approximation of  $\text{SW}_p$ :** We recall the definition of the SW distance below.

$$\text{SW}_p^p(\mu, \nu) = \int_{\mathbb{S}^{d-1}} \mathbf{W}_p^p(u_\#^* \mu, u_\#^* \nu) d\sigma(u), \quad (\text{S27})$$

where  $\sigma$  is the uniform distribution on  $\mathbb{S}^{d-1}$  and for any measurable function  $f : Y \rightarrow \mathbb{R}$  and  $\zeta \in \mathcal{P}(Y)$ ,  $f_\# \zeta$  is the push-forward measure of  $\zeta$  by  $f$ . We approximate the integral in (S27) by selecting a finite set of projections  $U \subset \mathbb{S}^{d-1}$  and computing the empirical average:

$$\text{SW}_p^p(\mu, \nu) \approx \frac{1}{\text{card}(U)} \sum_{u \in U} \mathbf{W}_p^p(u_\#^* \mu, u_\#^* \nu) \quad (\text{S28})$$

The quality of this approximation depends on the sampling of  $\mathbb{S}^{d-1}$ . In our work, we use random samples picked uniformly on  $\mathbb{S}^{d-1}$ , as proposed in [12] and explained hereafter (see paragraph ‘‘Sampling schemes’’).

The Wasserstein distance between two one-dimensional probability densities  $\mu$  and  $\nu$  as defined in (6) is also estimated by replacing the integrals with a Monte Carlo estimate, and we can use two distinct methods to approximate this quantity.

The first approximation we consider is given by,

$$\mathbf{W}_p^p(\mu, \nu) \approx \frac{1}{K} \sum_{k=1}^K \left| \tilde{F}_\mu^{-1}(t_k) - \tilde{F}_\nu^{-1}(t_k) \right|^p, \quad (\text{S29})$$

where  $\{t_k\}_{k=1}^K$  are uniform and independent samples from  $[0, 1]$  and for  $\xi \in \{\mu, \nu\}$ ,  $\tilde{F}_\xi^{-1}$  is a linear interpolation of  $\bar{F}_\xi^{-1}$  which denotes either the exact quantile function of  $\xi$  if  $\xi$  is discrete, or an approximation by a Monte Carlo procedure. This last option is justified by the Glivenko-Cantelli Theorem.

The second approximation is given by,

$$\mathbf{W}_p^p(\mu, \nu) \approx \frac{1}{K} \sum_{k=1}^K \left| s_k - \tilde{F}_\nu^{-1}(\tilde{F}_\mu(s_k)) \right|^p, \quad (\text{S30})$$

where  $\{s_k\}_{k=1}^K$  are uniform and independent samples from  $\mu$  and for  $\xi \in \{\mu, \nu\}$ ,  $\tilde{F}_\xi$  (resp.  $\tilde{F}_\xi^{-1}$ ) is a linear interpolation of  $\bar{F}_\xi$  (resp.  $\bar{F}_\xi^{-1}$ ) which denotes either the exact cumulative distribution function (resp. quantile function) of  $\xi$  if  $\xi$  is discrete or an approximation by a Monte Carlo procedure.

**Sampling schemes:** We explain the methods that we used to generate i.i.d. samples from the uniform distribution on the  $d$ -dimensional sphere  $\mathbb{S}^{d-1}$  and from multivariate elliptically contoured stable distributions.

- **Uniform sampling on the sphere.** To sample from  $\mathbb{S}^{d-1}$ , we form the  $d$ -dimensional vector  $s$  by drawing each of its  $d$  components from the standard normal distribution  $\mathcal{N}(0, 1)$  and we normalize it:  $s' = s/\|s\|_2$ , so that  $s'$  lies on the sphere.
- **Sampling from multivariate elliptically contoured stable distributions.** We recall that if  $Y \in \mathbb{R}^d$  is  $\alpha$ -stable and elliptically contoured, *i.e.*  $Y \sim \mathcal{E}\alpha\mathcal{S}_c(\Sigma, \mathbf{m})$ , then its joint characteristic function is defined as, for any  $\mathbf{t} \in \mathbb{R}^d$ ,

$$\mathbb{E}[\exp(it^T Y)] = \exp\left(-(\mathbf{t}^T \Sigma \mathbf{t})^{\alpha/2} + it^T \mathbf{m}\right), \quad (\text{S31})$$

where  $\Sigma$  is a positive definite matrix (akin to a correlation matrix),  $\mathbf{m} \in \mathbb{R}^d$  is a location vector (equal to the mean if it exists) and  $\alpha \in (0, 2)$  controls the thickness of the tail. Elliptically contoured stable distributions are scale mixtures of multivariate Gaussian distributions

[13, Proposition 2.5.2], whose densities are intractable, but can easily be simulated [14]: let  $A \sim \mathcal{S}_{\alpha/2}(\beta, \gamma, \delta)$  be a one-dimensional positive  $(\alpha/2)$ -stable random variable with  $\beta = 1$ ,  $\gamma = 2 \cos(\frac{\pi\alpha}{4})^{2/\alpha}$  and  $\delta = 0$ , and  $G \sim \mathcal{N}(\mathbf{0}, \Sigma)$ . Then,  $Y = \sqrt{A}G + \mathbf{m}$  has (S31) as characteristic function.

**Optimization methods:** Computing the MSWE and MESWE implies minimizing the (expected) Sliced-Wasserstein distance over the set of parameters. In our experiments, we used different optimization methods as we detail below.

- **Multivariate Gaussian distributions.** We derive the explicit gradient expressions of the approximate  $\mathbf{SW}_2^2$  distance with respect to the mean and scale parameters  $\mathbf{m}$  and  $\sigma^2$ , and we use the ADAM stochastic optimization method with the default parameter settings suggested in [15]. For the MSWE, we use (S30) to approximate the one-dimensional Wasserstein distance, and we evaluate directly the Gaussian density of the generated samples, utilizing the fact that the projection of a Gaussian of parameters  $(\mathbf{m}, \sigma^2 \mathbf{I})$  along  $u \in \mathbb{S}^{d-1}$  is a 1D normal distribution of parameters  $(\langle u, \mathbf{m} \rangle, \sigma^2 \langle u, u \rangle)$ . In this case, the gradient of the approximate  $\mathbf{SW}_2^2$  between  $\mu = \mathcal{N}(\mathbf{m}, \sigma^2 \mathbf{I})$  and the empirical distribution associated to  $n$  samples drawn by  $\mathcal{N}(\mathbf{m}_*, \sigma_*^2 \mathbf{I})$ , denoted by  $\hat{\nu}$ , is given by,

$$\begin{aligned} \nabla_{\mathbf{m}} \mathbf{SW}_2^2(\mu, \hat{\nu}) &= \frac{1}{\text{card}(\mathbf{U}) \text{card}(\mathbf{S})} \sum_{u \in \mathbf{U}, s \in \mathbf{S}} \left( \left| s - \tilde{F}_{u_* \hat{\nu}}^{-1}(\tilde{F}_{u_* \mu}(s)) \right|^2 \mathcal{N}(s; \langle u, \mathbf{m} \rangle, \sigma^2 \|u\|^2) \right. \\ &\quad \left. \frac{s - \langle u, \mathbf{m} \rangle}{\sigma^2 \|u\|^2} u \right), \\ \nabla_{\sigma^2} \mathbf{SW}_2^2(\mu, \hat{\nu}) &= \frac{1}{\text{card}(\mathbf{U}) \text{card}(\mathbf{S})} \sum_{u \in \mathbf{U}, s \in \mathbf{S}} \left( \left| s - \tilde{F}_{u_* \hat{\nu}}^{-1}(\tilde{F}_{u_* \mu}(s)) \right|^2 \mathcal{N}(s; \langle u, \mathbf{m} \rangle, \sigma^2 \|u\|^2) \right. \\ &\quad \left. \frac{1}{2\sigma^2} \left( \frac{(s - \langle u, \mathbf{m} \rangle)^2}{\sigma^2 \|u\|^2} - 1 \right) \right), \end{aligned}$$

where  $\mathbf{U} \subset \mathbb{S}^{d-1}$  is a finite set of random projections picked uniformly on  $\mathbb{S}^{d-1}$ ,  $\mathbf{S}$  is a finite subset in  $\mathbb{R}$ , and for any  $s \in \mathbf{S}$ ,  $\mathcal{N}(s; \langle u, \mathbf{m} \rangle, \sigma^2 \|u\|^2)$  denotes the density function of the Gaussian of parameters  $(\langle u, \mathbf{m} \rangle, \sigma^2 \|u\|^2)$  evaluated at  $s$ .

For the MESWE, we use (S29) and evaluate the empirical distribution of generated samples instead of their normal density. Therefore, the gradient of the approximate  $\mathbf{SW}_2^2$  between the empirical distributions corresponding to one generated dataset of  $m$  samples drawn from  $\mathcal{N}(\mu, \sigma^2 \mathbf{I})$  and  $n$  samples drawn from  $\mathcal{N}(\mu_*, \sigma_*^2 \mathbf{I})$ , respectively denoted by  $\hat{\mu}$  and  $\hat{\nu}$ , is obtained with,

$$\begin{aligned} \nabla_{\mathbf{m}} \mathbf{SW}_2^2(\hat{\mu}, \hat{\nu}) &= \frac{-2}{\text{card}(\mathbf{U}) \cdot K} \sum_{u \in \mathbf{U}} \sum_{k=1}^K \left| \tilde{F}_{u_* \hat{\mu}}^{-1}(t_k) - \tilde{F}_{u_* \hat{\nu}}^{-1}(t_k) \right| u, \\ \nabla_{\sigma^2} \mathbf{SW}_2^2(\hat{\mu}, \hat{\nu}) &= \frac{1}{\text{card}(\mathbf{U}) \cdot K} \sum_{u \in \mathbf{U}} \sum_{k=1}^K \left| \tilde{F}_{u_* \hat{\mu}}^{-1}(t_k) - \tilde{F}_{u_* \hat{\nu}}^{-1}(t_k) \right| \frac{\langle u, \mathbf{m} \rangle - \tilde{F}_{u_* \hat{\mu}}^{-1}(t_k)}{\sigma^2}. \end{aligned}$$

- **Multivariate elliptically contoured stable distributions.** When comparing MESWE to MEWE, we approximate these estimators using the derivative-free optimization method Nelder-Mead (implemented in `Scipy`), following the approach in [6].

When illustrating the theoretical properties of MESWE, we proceed in the same way as for the multivariate Gaussian experiment: we compute the explicit gradient expression of the approximate  $\mathbf{SW}_2^2$  distance with respect to the location parameter  $\mathbf{m}$ , and we use the ADAM stochastic optimization method with the default settings. Equation (S32) gives the formula of the gradient of the approximate  $\mathbf{SW}_2^2$  between the empirical distributions of one generated dataset of  $m$  samples drawn from  $\mathcal{E}\alpha\mathcal{S}_c(\mathbf{I}, \mathbf{m})$  and  $n$  samples drawn from  $\mathcal{E}\alpha\mathcal{S}_c(\mathbf{I}, \mathbf{m}_*)$ , respectively denoted by  $\hat{\mu}$  and  $\hat{\nu}$ , with respect to  $\mathbf{m}$ .

$$\nabla_{\mathbf{m}} \mathbf{SW}_2^2(\hat{\mu}, \hat{\nu}) = \frac{-2}{\text{card}(\mathbf{U}) \cdot K} \sum_{u \in \mathbf{U}} \sum_{k=1}^K \left| \tilde{F}_{u_* \hat{\mu}}^{-1}(t_k) - \tilde{F}_{u_* \hat{\nu}}^{-1}(t_k) \right| u. \quad (\text{S32})$$

- **High-dimensional real data using GANs.** We use the ADAM optimizer provided by TensorFlow GPU.

**Computing infrastructure:** The experiment comparing the computational time of MESWE and MEWE was conducted on a daily-use laptop (CPU intel core i7, 1.90GHz  $\times$  8 and 16GB of RAM). The neural network experiment was run on a cluster with 4 relatively modern GPUs.

## References

- [1] R.T. Rockafellar, M. Wets, and R.J.B. Wets. *Variational Analysis*. Grundlehren der mathematischen Wissenschaften. Springer Berlin Heidelberg, 2009.
- [2] Cédric Villani. *Optimal Transport: Old and New*. Grundlehren der mathematischen Wissenschaften. Springer, 2009 edition, September 2008.
- [3] Patrick Billingsley. *Convergence of probability measures*. Wiley Series in Probability and Statistics: Probability and Statistics. John Wiley & Sons Inc., New York, second edition, 1999. A Wiley-Interscience Publication.
- [4] L. D. Brown and R. Purves. Measurable selections of extrema. *Ann. Statist.*, 1(5):902–912, 09 1973.
- [5] Federico Bassetti, Antonella Bodini, and Eugenio Regazzini. On minimum kantorovich distance estimators. *Statistics & Probability Letters*, 76(12):1298 – 1302, 2006.
- [6] E. Bernton, P. E. Jacob, M. Gerber, and C. P. Robert. On parameter estimation with the Wasserstein distance. *Information and Inference: A Journal of the IMA*, Jan 2019.
- [7] V.I. Bogachev. *Measure Theory*. Number vol. 1 in Measure Theory. Springer Berlin Heidelberg, 2007.
- [8] O. Kallenberg. *Foundations of modern probability*. Probability and its Applications (New York). Springer-Verlag, New York, 1997.
- [9] G. B. Folland. *Real analysis*. Pure and Applied Mathematics (New York). John Wiley & Sons, Inc., New York, second edition, 1999. Modern techniques and their applications, A Wiley-Interscience Publication.
- [10] C.D. Aliprantis, K.C. Border, and K.C. Border. *Infinite Dimensional Analysis: A Hitchhiker’s Guide*. Studies in economic theory. Springer, 1999.
- [11] D. Pollard. The minimum distance method of testing. *Metrika*, 27(1):43–70, Dec 1980.
- [12] Nicolas Bonneel, Julien Rabin, Gabriel Peyré, and Hanspeter Pfister. Sliced and Radon Wasserstein Barycenters of Measures. *Journal of Mathematical Imaging and Vision*, 1(51):22–45, 2015.
- [13] G. Samorodnitsky and M.S. Taqqu. *Stable Non-Gaussian Random Processes: Stochastic Models with Infinite Variance*. Stochastic Modeling Series. Taylor & Francis, 1994.
- [14] John P. Nolan. Multivariate elliptically contoured stable distributions: theory and estimation. *Computational Statistics*, 28(5):2067–2089, Oct 2013.
- [15] Diederik P. Kingma and Jimmy Ba. Adam: A method for stochastic optimization. In *3rd International Conference on Learning Representations, ICLR 2015, San Diego, CA, USA, May 7-9, 2015, Conference Track Proceedings*, 2015.
